# Supplementary material for: DeepBiomarker: Identifying Important Lab Tests from Electronic Medical Records for the Prediction of Suicide-Related Events among PTSD Patients
Source: MDPI journal article supplement (doi:10.3390/jpm12040524), 2022-03-24
Supplement: s1 [file s1]

Table S1: Important features identified by perturbation-based contribution analysis for SRE prediction:

| Feature Name                                                                                           | Diagnosis Code/DrugBankID/Lab Test | Relative Contribution | CI95up | CI95down | FDR_Q                   | p_bonferroni            |
|--------------------------------------------------------------------------------------------------------|------------------------------------|-----------------------|--------|----------|-------------------------|-------------------------|
| Esophageal reflux                                                                                      | 530.81                             | 1.72                  | 1.79   | 1.65     | $1.10 \times 10^{-128}$ | $2.20 \times 10^{-128}$ |
| EPINASTINE HCL 0.05% EYE DROPS                                                                         | DB00751                            | 2.76                  | 3.02   | 2.53     | $6.09 \times 10^{-99}$  | $1.83 \times 10^{-98}$  |
| Major depressive disorder, single episode, unspecified                                                 | F32.9                              | 1.58                  | 1.65   | 1.52     | $6.99 \times 10^{-87}$  | $2.80 \times 10^{-86}$  |
| Nicotine dependence, cigarettes, uncomplicated                                                         | F17.210                            | 1.52                  | 1.58   | 1.46     | $1.58 \times 10^{-80}$  | $7.90 \times 10^{-80}$  |
| Personal history of transient ischemic attack (TIA), and cerebral infarction without residual deficits | V12.54                             | 1.82                  | 1.93   | 1.72     | $2.21 \times 10^{-77}$  | $1.33 \times 10^{-76}$  |
| Anxiety state, unspecified                                                                             | 300                                | 1.50                  | 1.56   | 1.44     | $7.55 \times 10^{-74}$  | $5.29 \times 10^{-73}$  |
| GLUCOSE                                                                                                | GLUCOSE                            | 1.45                  | 1.51   | 1.38     | $9.19 \times 10^{-52}$  | $7.35 \times 10^{-51}$  |
| Periumbilical pain                                                                                     | R10.33                             | 1.88                  | 2.04   | 1.74     | $5.25 \times 10^{-49}$  | $4.72 \times 10^{-48}$  |
| Bipolar disorder, unspecified                                                                          | F31.9                              | 1.74                  | 1.86   | 1.62     | $6.88 \times 10^{-46}$  | $6.88 \times 10^{-45}$  |
| Unspecified asthma with (acute) exacerbation                                                           | J45.901                            | 1.49                  | 1.58   | 1.42     | $2.51 \times 10^{-43}$  | $2.76 \times 10^{-42}$  |
| Epilepsy, unspecified, without mention of intractable epilepsy                                         | 345.9                              | 1.86                  | 2.03   | 1.71     | $2.08 \times 10^{-41}$  | $2.50 \times 10^{-40}$  |
| Migraine, unspecified, without mention of intractable migraine, without mention of status migrainosus  | 346.9                              | 1.53                  | 1.63   | 1.45     | $5.85 \times 10^{-41}$  | $7.61 \times 10^{-40}$  |
| CHLORIDE(CL)                                                                                           | CHLORIDE(CL)                       | 1.41                  | 1.49   | 1.35     | $1.58 \times 10^{-36}$  | $2.21 \times 10^{-35}$  |
| Irritable bowel syndrome                                                                               | 564.1                              | 1.89                  | 2.09   | 1.72     | $5.50 \times 10^{-32}$  | $8.25 \times 10^{-31}$  |
| RDW                                                                                                    | RDW                                | 1.52                  | 1.63   | 1.42     | $2.38 \times 10^{-30}$  | $3.81 \times 10^{-29}$  |
| Mononeuritis of unspecified site                                                                       | 355.9                              | 1.45                  | 1.54   | 1.37     | $5.31 \times 10^{-30}$  | $9.03 \times 10^{-29}$  |
| Unspecified essential hypertension                                                                     | 401.9                              | 1.73                  | 1.89   | 1.58     | $2.36 \times 10^{-29}$  | $4.25 \times 10^{-28}$  |

|                                                                                |                 |       |       |       |                            |                         |
|--------------------------------------------------------------------------------|-----------------|-------|-------|-------|----------------------------|-------------------------|
| Personal history of tobacco use                                                | V15.82          | 1.33  | 1.40  | 1.27  | 4.27×<br>10 <sup>-28</sup> | 8.11× 10 <sup>-27</sup> |
| Anemia, unspecified                                                            | 285.9           | 1.44  | 1.53  | 1.36  | 1.15×<br>10 <sup>-27</sup> | 2.29× 10 <sup>-26</sup> |
| MCH                                                                            | MCH             | 1.50  | 1.61  | 1.40  | 3.55×<br>10 <sup>-27</sup> | 7.45× 10 <sup>-26</sup> |
| Unspecified viral hepatitis C without hepatic coma                             | 70.7            | 2.06  | 2.32  | 1.82  | 5.20×<br>10 <sup>-27</sup> | 1.14× 10 <sup>-25</sup> |
| HGB                                                                            | HGB             | 1.39  | 1.47  | 1.32  | 9.40×<br>10 <sup>-27</sup> | 2.16× 10 <sup>-25</sup> |
| Supervision of normal first pregnancy                                          | V22.0           | 0.460 | 0.523 | 0.402 | 9.56×<br>10 <sup>-27</sup> | 2.29× 10 <sup>-25</sup> |
| HEMATOCRIT(HCT)                                                                | HEMATOCRIT(HCT) | 1.38  | 1.46  | 1.31  | 2.54×<br>10 <sup>-26</sup> | 6.36× 10 <sup>-25</sup> |
| Other specified disorders of stomach and duodenum                              | 537.89          | 2.45  | 2.86  | 2.10  | 1.86×<br>10 <sup>-25</sup> | 4.83× 10 <sup>-24</sup> |
| Osteoporosis, unspecified                                                      | 733             | 2.45  | 2.88  | 2.09  | 5.31×<br>10 <sup>-24</sup> | 1.43× 10 <sup>-22</sup> |
| Unspecified acquired hypothyroidism                                            | 244.9           | 1.47  | 1.57  | 1.37  | 5.65×<br>10 <sup>-24</sup> | 1.58× 10 <sup>-22</sup> |
| Mononeuritis of unspecified site                                               | 355.9           | 1.90  | 2.13  | 1.69  | 6.43×<br>10 <sup>-24</sup> | 1.86× 10 <sup>-22</sup> |
| MCV                                                                            | MCV             | 1.50  | 1.61  | 1.39  | 1.52×<br>10 <sup>-23</sup> | 4.56× 10 <sup>-22</sup> |
| Pure hyperglyceridemia                                                         | E78.1           | 1.35  | 1.43  | 1.28  | 1.65×<br>10 <sup>-23</sup> | 5.12× 10 <sup>-22</sup> |
| WBC                                                                            | WBC             | 1.37  | 1.45  | 1.29  | 9.61×<br>10 <sup>-23</sup> | 3.08× 10 <sup>-21</sup> |
| Accident caused by hot liquids and vapors, including steam                     | E924.0          | 4.27  | 5.59  | 3.26  | 2.69×<br>10 <sup>-22</sup> | 8.88× 10 <sup>-21</sup> |
| Chest pain, unspecified                                                        | R07.9           | 1.42  | 1.52  | 1.33  | 1.68×<br>10 <sup>-21</sup> | 5.71× 10 <sup>-20</sup> |
| Accident caused by hot liquids and vapors, including steam                     | E924.0          | 4.13  | 5.43  | 3.14  | 1.63×<br>10 <sup>-20</sup> | 5.69× 10 <sup>-19</sup> |
| Accident caused by hot liquids and vapors, including steam                     | E924.0          | 4.77  | 6.46  | 3.52  | 2.86×<br>10 <sup>-20</sup> | 1.03× 10 <sup>-18</sup> |
| Osteoarthritis, unspecified whether generalized or localized, site unspecified | 715.9           | 1.41  | 1.51  | 1.32  | 1.89×<br>10 <sup>-19</sup> | 7.01× 10 <sup>-18</sup> |
| Undiagnosed cardiac murmurs                                                    | 785.2           | 1.80  | 2.03  | 1.60  | 5.08×<br>10 <sup>-19</sup> | 1.93× 10 <sup>-17</sup> |
| ANION GAP                                                                      | ANION GAP       | 1.44  | 1.55  | 1.34  | 1.45×<br>10 <sup>-18</sup> | 5.66× 10 <sup>-17</sup> |

|                                                                 |                       |       |       |       |                        |                        |
|-----------------------------------------------------------------|-----------------------|-------|-------|-------|------------------------|------------------------|
| BLOOD-URINE                                                     | BLOOD-URINE           | 1.29  | 1.35  | 1.22  | $1.51 \times 10^{-18}$ | $6.05 \times 10^{-17}$ |
| Other and unspecified angina pectoris                           | 413.9                 | 2.46  | 2.97  | 2.04  | $6.49 \times 10^{-18}$ | $2.66 \times 10^{-16}$ |
| ABS NEUTROPHILS                                                 | ABS NEUTROPHILS       | 1.29  | 1.36  | 1.22  | $1.48 \times 10^{-17}$ | $6.21 \times 10^{-16}$ |
| Post-traumatic stress disorder, unspecified                     | F43.10                | 1.31  | 1.39  | 1.24  | $5.28 \times 10^{-17}$ | $2.27 \times 10^{-15}$ |
| GLUCOSE-URINE                                                   | GLUCOSE-URINE         | 1.69  | 1.89  | 1.51  | $6.40 \times 10^{-17}$ | $2.82 \times 10^{-15}$ |
| Personal history of allergy to other specified medicinal agents | V14.8                 | 1.41  | 1.51  | 1.31  | $7.10 \times 10^{-17}$ | $3.19 \times 10^{-15}$ |
| Long-term (current) use of steroids                             | V58.65                | 1.35  | 1.45  | 1.27  | $8.70 \times 10^{-17}$ | $4.00 \times 10^{-15}$ |
| Personal history of malignant neoplasm of prostate              | V10.46                | 1.49  | 1.62  | 1.36  | $3.34 \times 10^{-16}$ | $1.57 \times 10^{-14}$ |
| Accident caused by other hot substance or object                | E924.8                | 2.57  | 3.16  | 2.08  | $6.82 \times 10^{-16}$ | $3.27 \times 10^{-14}$ |
| Accident caused by hot liquids and vapors, including steam      | E924.0                | 3.49  | 4.61  | 2.64  | $1.09 \times 10^{-15}$ | $5.32 \times 10^{-14}$ |
| Thalassemia, unspecified                                        | 282.4                 | 8.26  | 13.32 | 5.12  | $3.35 \times 10^{-15}$ | $1.68 \times 10^{-13}$ |
| Screening for malignant neoplasms of cervix                     | V76.2                 | 0.849 | 0.881 | 0.818 | $4.31 \times 10^{-15}$ | $2.20 \times 10^{-13}$ |
| Nausea with vomiting                                            | 787.01                | 1.36  | 1.46  | 1.27  | $4.56 \times 10^{-15}$ | $2.37 \times 10^{-13}$ |
| Primary hypercoagulable state                                   | 289.81                | 2.80  | 3.54  | 2.21  | $4.72 \times 10^{-15}$ | $2.50 \times 10^{-13}$ |
| Unspecified sleep apnea                                         | 780.57                | 1.32  | 1.40  | 1.24  | $4.85 \times 10^{-15}$ | $2.62 \times 10^{-13}$ |
| GLUCOSE (BEDSIDE TEST)                                          | GLUCOSE(BEDSIDE TEST) | 1.38  | 1.49  | 1.28  | $6.23 \times 10^{-15}$ | $3.43 \times 10^{-13}$ |
| Accident caused by hot liquids and vapors, including steam      | E924.0                | 4.45  | 6.27  | 3.16  | $6.64 \times 10^{-15}$ | $3.72 \times 10^{-13}$ |
| Acute sinusitis, unspecified                                    | 461.9                 | 0.739 | 0.792 | 0.689 | $6.91 \times 10^{-15}$ | $3.94 \times 10^{-13}$ |
| Arthropathy, unspecified, site unspecified                      | 716.9                 | 1.89  | 2.19  | 1.63  | $7.92 \times 10^{-15}$ | $4.60 \times 10^{-13}$ |
| Screening for unspecified condition                             | V82.9                 | 0.813 | 0.853 | 0.775 | $1.41 \times 10^{-14}$ | $8.30 \times 10^{-13}$ |
| Activity, other specified                                       | Y93.89                | 1.20  | 1.25  | 1.15  | $2.36 \times 10^{-14}$ | $1.42 \times 10^{-12}$ |

|                                                         |                              |       |       |       |                            |                         |
|---------------------------------------------------------|------------------------------|-------|-------|-------|----------------------------|-------------------------|
| ABS BASOPHILS                                           | ABS<br>BASOPHILS             | 1.35  | 1.45  | 1.26  | 2.62×<br>10 <sup>-14</sup> | 1.60× 10 <sup>-12</sup> |
| RBC                                                     | RBC                          | 1.27  | 1.34  | 1.20  | 3.61×<br>10 <sup>-14</sup> | 2.24× 10 <sup>-12</sup> |
| Unspecified transient cerebral ischemia                 | 435.9                        | 7.09  | 11.27 | 4.46  | 4.58×<br>10 <sup>-14</sup> | 2.88× 10 <sup>-12</sup> |
| Other and unspecified rheumatic aortic diseases         | 395.9                        | 8.08  | 13.29 | 4.91  | 6.53×<br>10 <sup>-14</sup> | 4.18× 10 <sup>-12</sup> |
| POTASSIUM(K)                                            | POTASSIUM(K)                 | 1.28  | 1.35  | 1.20  | 7.41×<br>10 <sup>-14</sup> | 4.81× 10 <sup>-12</sup> |
| Obesity, unspecified                                    | E66.9                        | 1.29  | 1.37  | 1.21  | 1.19×<br>10 <sup>-13</sup> | 7.98× 10 <sup>-12</sup> |
| Osteitis deformans without mention of bone tumor        | 731                          | 14.63 | 27.90 | 7.67  | 1.19×<br>10 <sup>-13</sup> | 7.99× 10 <sup>-12</sup> |
| Malignant neoplasm of pancreas, part unspecified        | 157.9                        | 0.131 | 0.214 | 0.080 | 1.29×<br>10 <sup>-13</sup> | 8.75× 10 <sup>-12</sup> |
| VITAMIN D2 1.25 MG (50,000 UNIT)                        | DB00153 DB1<br>1094          | 0.673 | 0.740 | 0.611 | 1.33×<br>10 <sup>-13</sup> | 9.19× 10 <sup>-12</sup> |
| Accident caused by other hot substance or object        | E924.8                       | 3.77  | 5.19  | 2.73  | 1.39×<br>10 <sup>-13</sup> | 9.72× 10 <sup>-12</sup> |
| Pain in unspecified joint                               | M25.50                       | 0.755 | 0.809 | 0.704 | 4.40×<br>10 <sup>-13</sup> | 3.12× 10 <sup>-11</sup> |
| INR                                                     | INR                          | 1.96  | 2.31  | 1.66  | 4.61×<br>10 <sup>-13</sup> | 3.32× 10 <sup>-11</sup> |
| Accident caused by other hot substance or object        | E924.8                       | 3.00  | 3.95  | 2.28  | 1.17×<br>10 <sup>-12</sup> | 8.53× 10 <sup>-11</sup> |
| Other convulsions                                       | 780.39                       | 1.50  | 1.66  | 1.36  | 1.18×<br>10 <sup>-12</sup> | 8.77× 10 <sup>-11</sup> |
| IONIZED CALCIUM, ISTAT                                  | IONIZED<br>CALCIUM,<br>ISTAT | 1.66  | 1.88  | 1.46  | 1.65×<br>10 <sup>-12</sup> | 1.24× 10 <sup>-10</sup> |
| TACROLIMUS CAP 1MG                                      | DB00864                      | 0.415 | 0.520 | 0.332 | 3.63×<br>10 <sup>-12</sup> | 2.76× 10 <sup>-10</sup> |
| Home accidents                                          | E849.0                       | 1.17  | 1.21  | 1.12  | 3.74×<br>10 <sup>-12</sup> | 2.88× 10 <sup>-10</sup> |
| Other specified aftercare                               | V58.89                       | 2.82  | 3.68  | 2.16  | 4.51×<br>10 <sup>-12</sup> | 3.52× 10 <sup>-10</sup> |
| Chronic pancreatitis                                    | 577.1                        | 2.25  | 2.78  | 1.82  | 8.20×<br>10 <sup>-12</sup> | 6.48× 10 <sup>-10</sup> |
| IONIZED CALCIUM                                         | IONIZED<br>CALCIUM           | 0.498 | 0.598 | 0.415 | 9.33×<br>10 <sup>-12</sup> | 7.47× 10 <sup>-10</sup> |
| Diverticulosis of colon (without mention of hemorrhage) | 562.1                        | 1.71  | 1.96  | 1.48  | 1.38×<br>10 <sup>-11</sup> | 1.12× 10 <sup>-09</sup> |
| Acute, but ill-defined, cerebrovascular disease         | 436                          | 4.09  | 5.93  | 2.82  | 1.71×<br>10 <sup>-11</sup> | 1.40× 10 <sup>-09</sup> |

|                                                                                 |                       |       |       |       |                        |                        |
|---------------------------------------------------------------------------------|-----------------------|-------|-------|-------|------------------------|------------------------|
| Unspecified disorder of kidney and ureter                                       | 593.9                 | 1.93  | 2.30  | 1.62  | 2.59×10 <sup>-11</sup> | 2.15×10 <sup>-09</sup> |
| Accident caused by other hot substance or object                                | E924.8                | 2.97  | 3.97  | 2.22  | 2.92×10 <sup>-11</sup> | 2.45×10 <sup>-09</sup> |
| MEPHYTON 5 MG TABLET                                                            | DB01022               | 0.248 | 0.361 | 0.171 | 3.39×10 <sup>-11</sup> | 2.88×10 <sup>-09</sup> |
| Personal history of irradiation, presenting hazards to health                   | V15.3                 | 0.641 | 0.723 | 0.568 | 7.04×10 <sup>-11</sup> | 6.06×10 <sup>-09</sup> |
| BACTERIA                                                                        | BACTERIA              | 1.23  | 1.30  | 1.16  | 9.21×10 <sup>-11</sup> | 8.01×10 <sup>-09</sup> |
| Other specific disorders of sleep of nonorganic origin                          | 307.49                | 0.563 | 0.659 | 0.481 | 1.02×10 <sup>-10</sup> | 8.96×10 <sup>-09</sup> |
| Alzheimer's disease                                                             | 331                   | 3.10  | 4.23  | 2.27  | 1.32×10 <sup>-10</sup> | 1.17×10 <sup>-08</sup> |
| Enlargement of lymph nodes                                                      | 785.6                 | 0.590 | 0.683 | 0.510 | 1.55×10 <sup>-10</sup> | 1.40×10 <sup>-08</sup> |
| MYCOPHENOLATE 250 MG CAPSULES                                                   | DB00688               | 0.330 | 0.449 | 0.243 | 1.89×10 <sup>-10</sup> | 1.72×10 <sup>-08</sup> |
| Unspecified hearing loss                                                        | 389.9                 | 1.85  | 2.19  | 1.56  | 2.45×10 <sup>-10</sup> | 2.25×10 <sup>-08</sup> |
| Hyperosmolality and hypernatremia                                               | E87.0                 | 1.43  | 1.58  | 1.29  | 2.93×10 <sup>-10</sup> | 2.72×10 <sup>-08</sup> |
| BASE EXCESS                                                                     | BASE EXCESS           | 0.460 | 0.573 | 0.370 | 3.80×10 <sup>-10</sup> | 3.57×10 <sup>-08</sup> |
| TOTAL PROTEIN                                                                   | TOTAL PROTEIN         | 1.24  | 1.32  | 1.17  | 1.16×10 <sup>-09</sup> | 1.10×10 <sup>-07</sup> |
| CALCIUM (CA)                                                                    | CALCIUM(CA)           | 1.20  | 1.27  | 1.14  | 1.32×10 <sup>-09</sup> | 1.27×10 <sup>-07</sup> |
| RED BLOOD CELLS-URINE                                                           | RED BLOOD CELLS-URINE | 1.22  | 1.29  | 1.15  | 2.09×10 <sup>-09</sup> | 2.03×10 <sup>-07</sup> |
| CARTIA XT 240 MG CAPSULE                                                        | DB00343               | 1.82  | 2.18  | 1.53  | 2.10×10 <sup>-09</sup> | 2.06×10 <sup>-07</sup> |
| Other respiratory abnormalities                                                 | 786.09                | 0.818 | 0.868 | 0.771 | 2.17×10 <sup>-09</sup> | 2.15×10 <sup>-07</sup> |
| SODIUM (NA)                                                                     | SODIUM(NA)            | 1.26  | 1.35  | 1.18  | 2.67×10 <sup>-09</sup> | 2.67×10 <sup>-07</sup> |
| PROTHROMBIN TIME                                                                | PROTHROMBIN TIME      | 1.75  | 2.06  | 1.48  | 2.71×10 <sup>-09</sup> | 2.74×10 <sup>-07</sup> |
| MPV                                                                             | MPV                   | 3.84  | 5.77  | 2.56  | 6.06×10 <sup>-09</sup> | 6.19×10 <sup>-07</sup> |
| Atherosclerotic heart disease of native coronary artery without angina pectoris | I25.10                | 1.33  | 1.45  | 1.22  | 7.78×10 <sup>-09</sup> | 8.01×10 <sup>-07</sup> |

|                                                                                                    |                        |       |       |       |                        |                        |
|----------------------------------------------------------------------------------------------------|------------------------|-------|-------|-------|------------------------|------------------------|
| CEPHALEXIN 500 MG CAPSULE                                                                          | DB00567                | 0.816 | 0.869 | 0.767 | $8.62 \times 10^{-09}$ | $8.97 \times 10^{-07}$ |
| VOL-PLUS TAB                                                                                       | DB01592                | 0.794 | 0.852 | 0.739 | $9.33 \times 10^{-09}$ | $9.80 \times 10^{-07}$ |
| STELARA 90 MG/ML SYRINGE                                                                           | DB05679                | 3.05  | 4.30  | 2.17  | $1.02 \times 10^{-08}$ | $1.08 \times 10^{-06}$ |
| PLATELETS                                                                                          | PLATELETS              | 1.29  | 1.39  | 1.19  | $1.03 \times 10^{-08}$ | $1.10 \times 10^{-06}$ |
| Anorexia nervosa                                                                                   | 307.1                  | 2.50  | 3.31  | 1.88  | $1.30 \times 10^{-08}$ | $1.41 \times 10^{-06}$ |
| Gastroschisis                                                                                      | 756.73                 | 4.08  | 6.30  | 2.64  | $1.33 \times 10^{-08}$ | $1.44 \times 10^{-06}$ |
| Complications of transplanted lung                                                                 | 996.84                 | 0.273 | 0.408 | 0.183 | $1.43 \times 10^{-08}$ | $1.57 \times 10^{-06}$ |
| MONUROL 3 GM SACHET                                                                                | DB00828 DB03754        | 0.344 | 0.479 | 0.247 | $1.78 \times 10^{-08}$ | $1.98 \times 10^{-06}$ |
| Liver replaced by transplant                                                                       | V42.7                  | 1.97  | 2.44  | 1.60  | $1.99 \times 10^{-08}$ | $2.23 \times 10^{-06}$ |
| CHOLESTEROL                                                                                        | CHOLESTEROL            | 0.828 | 0.878 | 0.780 | $2.35 \times 10^{-08}$ | $2.66 \times 10^{-06}$ |
| ENALAPRIL 20 MG TABLETS                                                                            | DB00584                | 0.375 | 0.511 | 0.276 | $2.42 \times 10^{-08}$ | $2.76 \times 10^{-06}$ |
| NEUT                                                                                               | NEUT                   | 0.530 | 0.647 | 0.434 | $2.50 \times 10^{-08}$ | $2.88 \times 10^{-06}$ |
| TROSPIMUM CHLORIDE ER 60 MG CAP                                                                    | DB00209                | 2.25  | 2.91  | 1.74  | $2.70 \times 10^{-08}$ | $3.13 \times 10^{-06}$ |
| VITAMIN B12 500 MCG TABLET                                                                         | DB00115                | 0.755 | 0.826 | 0.690 | $4.03 \times 10^{-08}$ | $4.71 \times 10^{-06}$ |
| LYMPH                                                                                              | LYMPH                  | 0.544 | 0.662 | 0.447 | $5.77 \times 10^{-08}$ | $6.80 \times 10^{-06}$ |
| ASPARTATE AMINOT (AST)                                                                             | ASPARTATE AMINOT.(AST) | 1.17  | 1.24  | 1.11  | $6.09 \times 10^{-08}$ | $7.25 \times 10^{-06}$ |
| SAW PALMETTO 160 MG CAPSULE                                                                        | DB14360                | 0.403 | 0.540 | 0.300 | $6.10 \times 10^{-08}$ | $7.32 \times 10^{-06}$ |
| LIPASE                                                                                             | LIPASE                 | 1.31  | 1.43  | 1.20  | $6.34 \times 10^{-08}$ | $7.67 \times 10^{-06}$ |
| Acute bronchitis                                                                                   | 466                    | 0.794 | 0.856 | 0.737 | $6.92 \times 10^{-08}$ | $8.45 \times 10^{-06}$ |
| Chronic gastric ulcer without mention of hemorrhage or perforation, without mention of obstruction | 531.7                  | 2.86  | 4.02  | 2.03  | $7.16 \times 10^{-08}$ | $8.80 \times 10^{-06}$ |
| Other musculoskeletal symptoms referable to limbs                                                  | 729.89                 | 0.526 | 0.648 | 0.426 | $8.00 \times 10^{-08}$ | $9.92 \times 10^{-06}$ |

|                                                                                    |                    |       |       |       |                            |                         |
|------------------------------------------------------------------------------------|--------------------|-------|-------|-------|----------------------------|-------------------------|
| Paralysis agitans                                                                  | 332                | 3.31  | 4.88  | 2.24  | 8.55×<br>10 <sup>-08</sup> | 1.07× 10 <sup>-05</sup> |
| Mitral valve insufficiency and aortic valve insufficiency                          | 396.3              | 1.80  | 2.18  | 1.49  | 8.67×<br>10 <sup>-08</sup> | 1.09× 10 <sup>-05</sup> |
| Enthesopathy of hip region                                                         | 726.5              | 0.435 | 0.571 | 0.331 | 8.76×<br>10 <sup>-08</sup> | 1.11× 10 <sup>-05</sup> |
| Carcinoma in situ of anal canal                                                    | 230.5              | 0.407 | 0.546 | 0.303 | 9.52×<br>10 <sup>-08</sup> | 1.22× 10 <sup>-05</sup> |
| IGA                                                                                | IGA                | 2.23  | 2.90  | 1.71  | 1.08×<br>10 <sup>-07</sup> | 1.40× 10 <sup>-05</sup> |
| LEUKOCYTE ESTERASE                                                                 | LEUKOCYTE ESTERASE | 1.18  | 1.24  | 1.11  | 1.26×<br>10 <sup>-07</sup> | 1.64× 10 <sup>-05</sup> |
| EPITHELIAL CELLS                                                                   | EPITHELIAL CELLS   | 1.21  | 1.29  | 1.14  | 1.40×<br>10 <sup>-07</sup> | 1.84× 10 <sup>-05</sup> |
| MYCOPHENOLIC ACID DR 180 MG TB                                                     | DB01024            | 0.295 | 0.443 | 0.197 | 1.46×<br>10 <sup>-07</sup> | 1.93× 10 <sup>-05</sup> |
| PREDNISONE TAB 10 MG                                                               | DB00635            | 0.835 | 0.886 | 0.786 | 1.60×<br>10 <sup>-07</sup> | 2.12× 10 <sup>-05</sup> |
| Pneumonia, organism unspecified                                                    | 486                | 0.759 | 0.832 | 0.692 | 1.80×<br>10 <sup>-07</sup> | 2.41× 10 <sup>-05</sup> |
| Chronic airway obstruction, not elsewhere classified                               | 496                | 1.26  | 1.36  | 1.17  | 1.87×<br>10 <sup>-07</sup> | 2.52× 10 <sup>-05</sup> |
| Impetigo                                                                           | 684                | 2.78  | 3.92  | 1.97  | 1.87×<br>10 <sup>-07</sup> | 2.54× 10 <sup>-05</sup> |
| Mononeuritis of unspecified site                                                   | 355.9              | 1.78  | 2.16  | 1.47  | 1.87×<br>10 <sup>-07</sup> | 2.56× 10 <sup>-05</sup> |
| Mild dysplasia of cervix                                                           | 622.11             | 1.85  | 2.27  | 1.50  | 1.94×<br>10 <sup>-07</sup> | 2.67× 10 <sup>-05</sup> |
| SUPREP BOWEL PREP KIT                                                              | DB14500            | 0.848 | 0.897 | 0.802 | 2.61×<br>10 <sup>-07</sup> | 3.63× 10 <sup>-05</sup> |
| Disturbance of skin sensation                                                      | 782                | 0.799 | 0.862 | 0.740 | 2.80×<br>10 <sup>-07</sup> | 3.92× 10 <sup>-05</sup> |
| Acquired absence of intestine (large) (small)                                      | V45.72             | 1.28  | 1.40  | 1.18  | 3.33×<br>10 <sup>-07</sup> | 4.70× 10 <sup>-05</sup> |
| Open wound of knee, leg (except thigh), and ankle, without mention of complication | 891                | 0.608 | 0.721 | 0.513 | 3.95×<br>10 <sup>-07</sup> | 5.61× 10 <sup>-05</sup> |
| KETONES-URINE                                                                      | KETONES-URINE      | 1.19  | 1.27  | 1.12  | 4.46×<br>10 <sup>-07</sup> | 6.37× 10 <sup>-05</sup> |
| MCHC                                                                               | MCHC               | 1.20  | 1.27  | 1.12  | 4.67×<br>10 <sup>-07</sup> | 6.73× 10 <sup>-05</sup> |
| WHITE BLOOD CELLS-URINE                                                            | WHITE BLOOD        | 1.21  | 1.30  | 1.13  | 5.95×<br>10 <sup>-07</sup> | 8.62× 10 <sup>-05</sup> |

|                                                                                        |                    |       |       |       |                        |                        |
|----------------------------------------------------------------------------------------|--------------------|-------|-------|-------|------------------------|------------------------|
|                                                                                        | CELLS-<br>URINE    |       |       |       |                        |                        |
| Unspecified immunity deficiency                                                        | 279.3              | 3.41  | 5.24  | 2.22  | $6.54 \times 10^{-07}$ | $9.55 \times 10^{-05}$ |
| Abnormal cardiovascular function study, unspecified                                    | 794.3              | 0.776 | 0.848 | 0.709 | $7.46 \times 10^{-07}$ | 0.000110               |
| Poisoning by unspecified drug or medicinal substance                                   | 977.9              | 1.42  | 1.62  | 1.26  | $1.12 \times 10^{-06}$ | 0.000166               |
| ZENATANE 20 MG CAPSULE                                                                 | DB00982            | 3.77  | 6.06  | 2.35  | $1.24 \times 10^{-06}$ | 0.000185               |
| Other nonspecific findings on examination of urine                                     | 791.9              | 0.660 | 0.766 | 0.569 | $1.30 \times 10^{-06}$ | 0.000195               |
| Sprains and strains of unspecified site of knee and leg                                | 844.9              | 0.468 | 0.617 | 0.355 | $2.06 \times 10^{-06}$ | 0.000311               |
| TOBRAMYCIN-DEXAMETH OPTH SUSP                                                          | DB00684 DB01234    | 0.665 | 0.771 | 0.573 | $2.06 \times 10^{-06}$ | 0.000314               |
| Malignant neoplasm of kidney, except pelvis                                            | 189                | 0.361 | 0.524 | 0.249 | $2.27 \times 10^{-06}$ | 0.000347               |
| TORSEMIDE 10 MG TABLETS                                                                | DB00214            | 3.71  | 5.98  | 2.30  | $2.34 \times 10^{-06}$ | 0.000360               |
| Supervision of other high-risk pregnancy                                               | V23.89             | 0.678 | 0.782 | 0.588 | $2.42 \times 10^{-06}$ | 0.000375               |
| Other emphysema                                                                        | 492.8              | 0.656 | 0.766 | 0.562 | $2.48 \times 10^{-06}$ | 0.000388               |
| Colostomy status                                                                       | V44.3              | 2.00  | 2.59  | 1.55  | $2.70 \times 10^{-06}$ | 0.000423               |
| Personal history of noncompliance with medical treatment, presenting hazards to health | V15.81             | 1.22  | 1.32  | 1.14  | $2.84 \times 10^{-06}$ | 0.000448               |
| VITAMIN B12                                                                            | VITAMIN B12        | 0.800 | 0.869 | 0.737 | $3.24 \times 10^{-06}$ | 0.000515               |
| Teething syndrome                                                                      | 520.7              | 0.528 | 0.670 | 0.416 | $3.81 \times 10^{-06}$ | 0.000609               |
| Unspecified polyarthropathy or polyarthritis, site unspecified                         | 716.5              | 0.408 | 0.570 | 0.292 | $3.82 \times 10^{-06}$ | 0.000615               |
| Malignant neoplasm of larynx, unspecified                                              | 161.9              | 0.274 | 0.445 | 0.168 | $4.18 \times 10^{-06}$ | 0.000676               |
| UROBILINOGEN-URINE                                                                     | UROBILINOGEN-URINE | 0.823 | 0.885 | 0.765 | $4.18 \times 10^{-06}$ | 0.000681               |



|                                                                                 |                              |       |       |       |                        |          |
|---------------------------------------------------------------------------------|------------------------------|-------|-------|-------|------------------------|----------|
| Other B-complex deficiencies                                                    | 266.2                        | 0.664 | 0.774 | 0.569 | $4.38 \times 10^{-06}$ | 0.000719 |
| Rosuvastatin 10 Mg Tab Apot                                                     | DB01098                      | 1.71  | 2.10  | 1.40  | $4.42 \times 10^{-06}$ | 0.000730 |
| Other specified anomalies of stomach                                            | 750.7                        | 0.529 | 0.672 | 0.416 | $4.47 \times 10^{-06}$ | 0.000742 |
| Occlusion and stenosis of carotid artery without mention of cerebral infarction | 433.1                        | 0.504 | 0.652 | 0.389 | $4.70 \times 10^{-06}$ | 0.000785 |
| Paroxysmal supraventricular tachycardia                                         | 427                          | 0.542 | 0.683 | 0.430 | $4.84 \times 10^{-06}$ | 0.000813 |
| Other, mixed, or unspecified drug abuse, unspecified                            | 305.9                        | 1.617 | 1.938 | 1.348 | $5.11 \times 10^{-06}$ | 0.000864 |
| VERY LOW DENSITY LIPOPROTEIN                                                    | VERY LOW DENSITY LIPOPROTEIN | 0.765 | 0.847 | 0.692 | $5.37 \times 10^{-06}$ | 0.000913 |
| DULOXETINE HCL DR 30 MG CAP                                                     | DB00476                      | 1.26  | 1.37  | 1.15  | $5.45 \times 10^{-06}$ | 0.000932 |
| TRILYTE SOL                                                                     | DB01390 DB09153              | 0.678 | 0.786 | 0.585 | $6.08 \times 10^{-06}$ | 0.00105  |
| Other, mixed, or unspecified drug abuse, unspecified                            | 305.9                        | 1.36  | 1.52  | 1.21  | $6.75 \times 10^{-06}$ | 0.00117  |
| Phlebitis and thrombophlebitis of deep veins of lower extremities, other        | 451.19                       | 5.20  | 9.76  | 2.77  | $6.75 \times 10^{-06}$ | 0.00117  |
| Chronic mycotic otitis externa                                                  | 380.15                       | 0.582 | 0.716 | 0.473 | $6.87 \times 10^{-06}$ | 0.00120  |
| TRICYCLIC ANTIDEPRESSANTS                                                       | TRICYCLIC ANTIDEPRESSANTS    | 1.51  | 1.76  | 1.29  | $6.95 \times 10^{-06}$ | 0.00122  |
| PROTEIN-URINE                                                                   | PROTEIN-URINE                | 1.16  | 1.23  | 1.10  | $7.03 \times 10^{-06}$ | 0.00124  |
| PREZISTA 800 MG TABLET                                                          | DB00898 DB01264              | 4.77  | 8.68  | 2.62  | $7.09 \times 10^{-06}$ | 0.00126  |
| Proteinuria                                                                     | 791                          | 0.466 | 0.625 | 0.347 | $7.75 \times 10^{-06}$ | 0.00139  |
| Unspecified vitamin D deficiency                                                | 268.9                        | 0.822 | 0.887 | 0.762 | $1.01 \times 10^{-05}$ | 0.0018   |
| CARBON DIOXIDE (CO2)                                                            | CARBON DIOXIDE(CO2)          | 1.18  | 1.26  | 1.11  | $1.02 \times 10^{-05}$ | 0.00184  |

|                                                                          |                        |       |       |       |                        |         |
|--------------------------------------------------------------------------|------------------------|-------|-------|-------|------------------------|---------|
| Other persistent mental disorders due to conditions classified elsewhere | 294.8                  | 0.452 | 0.618 | 0.330 | $1.41 \times 10^{-05}$ | 0.00256 |
| Congestive heart failure, unspecified                                    | 428                    | 1.39  | 1.58  | 1.22  | $1.42 \times 10^{-05}$ | 0.00260 |
| Temporomandibular joint disorders, unspecified                           | 524.6                  | 0.668 | 0.784 | 0.570 | $1.42 \times 10^{-05}$ | 0.00260 |
| Alexia and dyslexia                                                      | 784.61                 | 0.288 | 0.471 | 0.176 | $1.43 \times 10^{-05}$ | 0.00265 |
| PRE ALBUMIN                                                              | PRE ALBUMIN            | 1.63  | 1.98  | 1.34  | $1.44 \times 10^{-05}$ | 0.00267 |
| Mitral valve disorders                                                   | 424                    | 1.61  | 1.94  | 1.33  | $1.55 \times 10^{-05}$ | 0.00289 |
| UREA NITROGEN                                                            | UREA NITROGEN          | 1.19  | 1.27  | 1.11  | $1.55 \times 10^{-05}$ | 0.00292 |
| DIPHENOXYLATE ATROPINE 2 5                                               | DB00572 DB01081        | 0.537 | 0.688 | 0.420 | $1.61 \times 10^{-05}$ | 0.00305 |
| Ganglion of joint                                                        | 727.41                 | 0.518 | 0.673 | 0.399 | $1.66 \times 10^{-05}$ | 0.00316 |
| ETHANOL (SERUM/PLASMA)                                                   | ETHANOL (SERUM/PLASMA) | 1.33  | 1.50  | 1.19  | $1.73 \times 10^{-05}$ | 0.00330 |
| Other complications due to genitourinary device, implant, and graft      | 996.76                 | 0.661 | 0.780 | 0.561 | $1.74 \times 10^{-05}$ | 0.00335 |
| Atrophic gastritis, without mention of hemorrhage                        | 535.1                  | 1.23  | 1.34  | 1.13  | $2.07 \times 10^{-05}$ | 0.00399 |
| Drug withdrawal                                                          | 292                    | 1.92  | 2.50  | 1.48  | $2.15 \times 10^{-05}$ | 0.00417 |
| DISULFIRAM 250 MG TABLET                                                 | DB00822                | 0.317 | 0.504 | 0.199 | $2.27 \times 10^{-05}$ | 0.00442 |
| Disability examination                                                   | V68.01                 | 0.707 | 0.814 | 0.614 | $2.53 \times 10^{-05}$ | 0.00495 |
| Chronic hepatitis C without mention of hepatic coma                      | 70.54                  | 1.54  | 1.84  | 1.29  | $2.57 \times 10^{-05}$ | 0.00508 |
| Malignant neoplasm of bone and articular cartilage, site unspecified     | 170.9                  | 1.97  | 2.59  | 1.49  | $2.57 \times 10^{-05}$ | 0.00510 |
| UIBC                                                                     | UIBC                   | 0.392 | 0.575 | 0.268 | $2.72 \times 10^{-05}$ | 0.00542 |
| AMOXICILLIN CAP 500 MG                                                   | DB01060                | 0.894 | 0.936 | 0.854 | $2.87 \times 10^{-05}$ | 0.00574 |
| Submucous leiomyoma of uterus                                            | 218                    | 0.662 | 0.784 | 0.559 | $3.22 \times 10^{-05}$ | 0.00650 |
| Issue of repeat prescriptions                                            | V68.1                  | 1.52  | 1.81  | 1.28  | $3.22 \times 10^{-05}$ | 0.00651 |

|                                                                                                                        |                         |       |       |       |                        |         |
|------------------------------------------------------------------------------------------------------------------------|-------------------------|-------|-------|-------|------------------------|---------|
| DEXILANT DR 60 MG CAPSULE                                                                                              | DB05351                 | 0.573 | 0.721 | 0.456 | $3.29 \times 10^{-05}$ | 0.00667 |
| Rheumatoid arthritis                                                                                                   | 714                     | 1.60  | 1.94  | 1.32  | $3.64 \times 10^{-05}$ | 0.00742 |
| Myalgia and myositis, unspecified                                                                                      | 729.1                   | 1.48  | 1.74  | 1.26  | $3.78 \times 10^{-05}$ | 0.00774 |
| VESICARE TAB 5 MG                                                                                                      | DB01591                 | 1.86  | 2.41  | 1.44  | $3.80 \times 10^{-05}$ | 0.00784 |
| Muscle spasm of back                                                                                                   | M62.830                 | 0.729 | 0.831 | 0.639 | $3.90 \times 10^{-05}$ | 0.00807 |
| Unspecified ectopic pregnancy without intrauterine pregnancy                                                           | 633.9                   | 0.277 | 0.473 | 0.163 | $4.07 \times 10^{-05}$ | 0.00847 |
| Cystic fibrosis with pulmonary manifestations                                                                          | 277.02                  | 0.199 | 0.391 | 0.102 | $4.45 \times 10^{-05}$ | 0.00930 |
| LOW DENSITY LIPOPROTEIN                                                                                                | LOW DENSITY LIPOPROTEIN | 0.834 | 0.900 | 0.773 | $4.68 \times 10^{-05}$ | 0.00983 |
| TRIAMCINOLON OIN 0.1%                                                                                                  | DB00620                 | 0.804 | 0.882 | 0.734 | $5.33 \times 10^{-05}$ | 0.0113  |
| ACARBOSE 25 MG TABLET                                                                                                  | DB00284                 | 2.03  | 2.74  | 1.51  | $5.33 \times 10^{-05}$ | 0.0113  |
| Malignant neoplasm of tonsil                                                                                           | 146                     | 0.420 | 0.605 | 0.291 | $5.33 \times 10^{-05}$ | 0.0114  |
| ALPRAZOLAM 0.5 MG TABLET                                                                                               | DB00404                 | 1.34  | 1.51  | 1.18  | $5.34 \times 10^{-05}$ | 0.0114  |
| Influenza with other respiratory manifestations                                                                        | 487.1                   | 0.665 | 0.790 | 0.560 | $5.43 \times 10^{-05}$ | 0.0117  |
| Sprains and strains of other specified sites of shoulder and upper arm                                                 | 840.8                   | 0.727 | 0.831 | 0.635 | $5.43 \times 10^{-05}$ | 0.0117  |
| Gout, unspecified                                                                                                      | 274.9                   | 1.79  | 2.28  | 1.40  | $5.48 \times 10^{-05}$ | 0.0119  |
| EVEROLIMUS                                                                                                             | EVEROLIMUS              | 3.62  | 6.23  | 2.10  | $5.48 \times 10^{-05}$ | 0.0119  |
| Cocaine abuse, unspecified                                                                                             | 305.6                   | 1.46  | 1.71  | 1.24  | $5.85 \times 10^{-05}$ | 0.0128  |
| Other venous complications of pregnancy and the puerperium, delivered, with or without mention of antepartum condition | 671.81                  | 0.467 | 0.646 | 0.338 | $6.21 \times 10^{-05}$ | 0.0137  |
| ZOLPIDEM TARTRATE 10 MG TABLET                                                                                         | DB00425                 | 0.717 | 0.826 | 0.622 | $6.75 \times 10^{-05}$ | 0.0149  |

|                                                                                                            |                              |       |       |       |                        |        |
|------------------------------------------------------------------------------------------------------------|------------------------------|-------|-------|-------|------------------------|--------|
| Hypertonicity of bladder                                                                                   | 596.51                       | 0.651 | 0.782 | 0.542 | $6.77 \times 10^{-05}$ | 0.0150 |
| CREATININE                                                                                                 | CREATININE                   | 1.21  | 1.32  | 1.12  | $7.04 \times 10^{-05}$ | 0.0157 |
| MY WAY 1.5 MG TABLET                                                                                       | DB00367                      | 0.749 | 0.848 | 0.662 | $7.11 \times 10^{-05}$ | 0.0159 |
| QUINAPRIL 40 MG TABLET                                                                                     | DB00881                      | 3.17  | 5.19  | 1.93  | $7.15 \times 10^{-05}$ | 0.0161 |
| CYCLOSPORIN MONOCLONAL ASSAY                                                                               | CYCLOSPORIN MONOCLONAL ASSAY | 0.378 | 0.573 | 0.249 | $7.15 \times 10^{-05}$ | 0.0162 |
| Chronic laryngitis                                                                                         | 476                          | 0.248 | 0.452 | 0.136 | $7.62 \times 10^{-05}$ | 0.0173 |
| Twin pregnancy, antepartum condition or complication                                                       | 651.03                       | 0.146 | 0.335 | 0.064 | $7.92 \times 10^{-05}$ | 0.0180 |
| DICYCLOMINE 10 MG CAPSULE                                                                                  | DB00804                      | 0.768 | 0.861 | 0.686 | $8.20 \times 10^{-05}$ | 0.0188 |
| Malignant neoplasm of liver, primary                                                                       | 155                          | 3.34  | 5.63  | 1.98  | $9.09 \times 10^{-05}$ | 0.0209 |
| Fibromyalgia                                                                                               | M79.7                        | 1.15  | 1.23  | 1.08  | $9.93 \times 10^{-05}$ | 0.0229 |
| Thyrotoxicosis without mention of goiter or other cause, and without mention of thyrotoxic crisis or storm | 242.9                        | 0.554 | 0.717 | 0.427 | 0.000104               | 0.0240 |
| Myrbetriq Tab 25 mg                                                                                        | DB08893                      | 1.97  | 2.65  | 1.46  | 0.000106               | 0.0247 |
| Melanoma of skin, site unspecified                                                                         | 172.9                        | 0.297 | 0.506 | 0.175 | 0.000109               | 0.0255 |
| Rheumatic tricuspid insufficiency                                                                          | I07.1                        | 0.664 | 0.795 | 0.555 | 0.000109               | 0.0257 |
| PERMETHRIN CRE 5%                                                                                          | DB04930                      | 0.680 | 0.805 | 0.574 | 0.000109               | 0.0257 |
| Elevated prostate specific antigen (PSA)                                                                   | 790.93                       | 0.421 | 0.616 | 0.288 | 0.00011                | 0.0261 |
| Hip joint replacement                                                                                      | V43.64                       | 0.725 | 0.835 | 0.630 | 0.000114               | 0.0271 |
| BANDS %                                                                                                    | BANDS %                      | 0.575 | 0.734 | 0.451 | 0.000119               | 0.0283 |
| ALMOTRIPTAN MALATE 12.5 MG TAB                                                                             | DB00918                      | 2.69  | 4.16  | 1.73  | 0.000128               | 0.0306 |
| TUMOR HCG & QUANT. PREGNANCY                                                                               | TUMOR HCG & QUANT. PREGNANCY | 0.697 | 0.818 | 0.594 | 0.000136               | 0.0328 |

|                                                                   |                                |       |       |       |              |        |
|-------------------------------------------------------------------|--------------------------------|-------|-------|-------|--------------|--------|
| FARXIGA 5 MG TABLET                                               | DB06292                        | 0.567 | 0.730 | 0.440 | 0.000<br>142 | 0.0343 |
| PROTEIN - URINE (POC)                                             | PROTEIN -<br>URINE (POC)       | 0.835 | 0.905 | 0.771 | 0.000<br>147 | 0.0356 |
| Alcoholic liver damage,<br>unspecified                            | 571.3                          | 0.513 | 0.691 | 0.381 | 0.000<br>148 | 0.0362 |
| Juvenile osteochondrosis of<br>lower extremity, excluding<br>foot | 732.4                          | 0.300 | 0.514 | 0.175 | 0.000<br>151 | 0.0370 |
| ABS MONOCYTES                                                     | ABS<br>MONOCYTES               | 1.16  | 1.24  | 1.08  | 0.000<br>151 | 0.0371 |
| LUPRON DEPOT 11.25 MG<br>3MO KIT                                  | DB00007                        | 0.361 | 0.570 | 0.229 | 0.000<br>153 | 0.0378 |
| EOSINOPHIL                                                        | EOSINOPHIL                     | 0.688 | 0.814 | 0.582 | 0.000<br>155 | 0.0386 |
| Alcohol abuse, unspecified                                        | 305                            | 1.43  | 1.68  | 1.22  | 0.000<br>161 | 0.0400 |
| ALANINE<br>AMINOTRANS(ALT)                                        | ALANINE<br>AMINOTRAN<br>S(ALT) | 1.14  | 1.21  | 1.08  | 0.000<br>162 | 0.0405 |
| Urinary frequency                                                 | 788.41                         | 0.818 | 0.896 | 0.748 | 0.000<br>167 | 0.0420 |
| Late effects of injury<br>purposely inflicted by other<br>person  | E969                           | 1.85  | 2.44  | 1.40  | 0.000<br>167 | 0.0422 |
| Other specified disorders of<br>rectum and anus                   | 569.49                         | 1.37  | 1.58  | 1.19  | 0.000<br>176 | 0.0445 |
| Atony of bladder                                                  | 596.4                          | 1.89  | 2.51  | 1.42  | 0.000<br>178 | 0.0451 |
| INGREZZA CAP 40MG                                                 | DB11915                        | 1.91  | 2.55  | 1.42  | 0.000<br>185 | 0.0471 |

Notes: RDW: Red cell distribution width, MCH: Mean corpuscular hemoglobin, HGB: Hemoglobin, HCT: Hematocrit, MCV: Mean corpuscular volume, WBC: White blood cell, ABS Neutrophils: Absolute neutrophil count, ABS Basophils: Absolute basophil count, RBC: Red blood cell, INR: International normalized ratio, Ionized calcium ISTAT: Ionized calcium instrument description and testing technologies, MPV: Mean platelet volume. Relative contribution value > 1: Risk, Relative contribution value < 1: Protective, FDR\_Q: false discovery rate adjusted Q value. The diagnostic codes mentioned in the table above (Diagnosis code/DrugBankID/lab tests) and used in our study are representatives of all 1639 diagnosis groups.

Table S2: Performance of traditional machine learning algorithms

|     | DT    | RF    | LR    | RF_validation | DT_validation | LR_validation |
|-----|-------|-------|-------|---------------|---------------|---------------|
| TP  | 585   | 454   | 676   | 440           | 436           | 636           |
| FP  | 200   | 70    | 170   | 59            | 201           | 187           |
| TN  | 875   | 1005  | 905   | 996           | 854           | 868           |
| FN  | 490   | 621   | 399   | 615           | 619           | 419           |
| TPR | 0.544 | 0.422 | 0.629 | 0.417         | 0.413         | 0.603         |
| PPV | 0.745 | 0.866 | 0.799 | 0.882         | 0.684         | 0.773         |
| NPV | 0.641 | 0.618 | 0.694 | 0.618         | 0.580         | 0.674         |
| F1  | 0.629 | 0.568 | 0.704 | 0.566         | 0.515         | 0.677         |
| AUC | 0.679 | 0.679 | 0.735 | 0.681         | 0.611         | 0.713         |

Notes: All models were set at a random state of 42 to ensure reproducibility, while the other hyper-parameters were left at default settings. The random state seeded the random number generator used in the models. For the final random forest model, we set estimators to 100 and the maximum number of features to the square root of the number of features. Because these two machine learning approaches cannot consider time, we only used the indicators as input. That is, if any abnormal lab test was reported within 1 year preceding the index date, that indicator was set as 1, otherwise as 0. TP: true positives; TN: true negatives; FP: false positives; FN: false negatives; TPR: true positive rate; PPV: positive predictive value; NPV: negative predictive value; AUC: area under curve; DT: decision tree; RF: random forest; LR: logistic regression.
